# Supplementary material for: Restoration of type I interferon signaling in intrahepatically primed CD8+ T cells promotes functional differentiation
Source: PubMed Central journal article supplement (PMC7934883; doi:10.1172/jci.insight.145761), 2021-02-08
Supplement: jciinsight-6-145761-s123.pdf [file jciinsight-6-145761-s123.pdf]

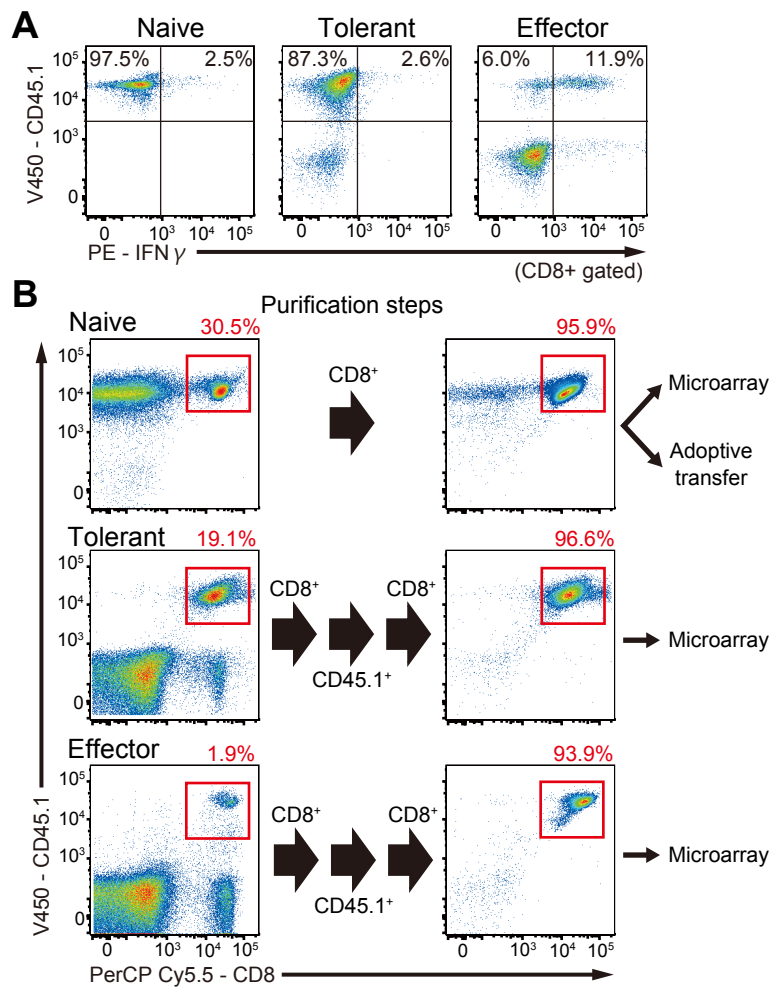

**Supplemental Figure. 1 Purification of tolerant and effector COR93-specific CD8<sup>+</sup> T cells.** (A) Representative dot blots of in vitro IFN $\gamma$  production in naive, tolerant, and effector COR93-specific CD8<sup>+</sup> T cells. (B) The percentage of COR93-specific CD8<sup>+</sup> T cells in total lymphocytes before (left) and after (right) purification procedures.

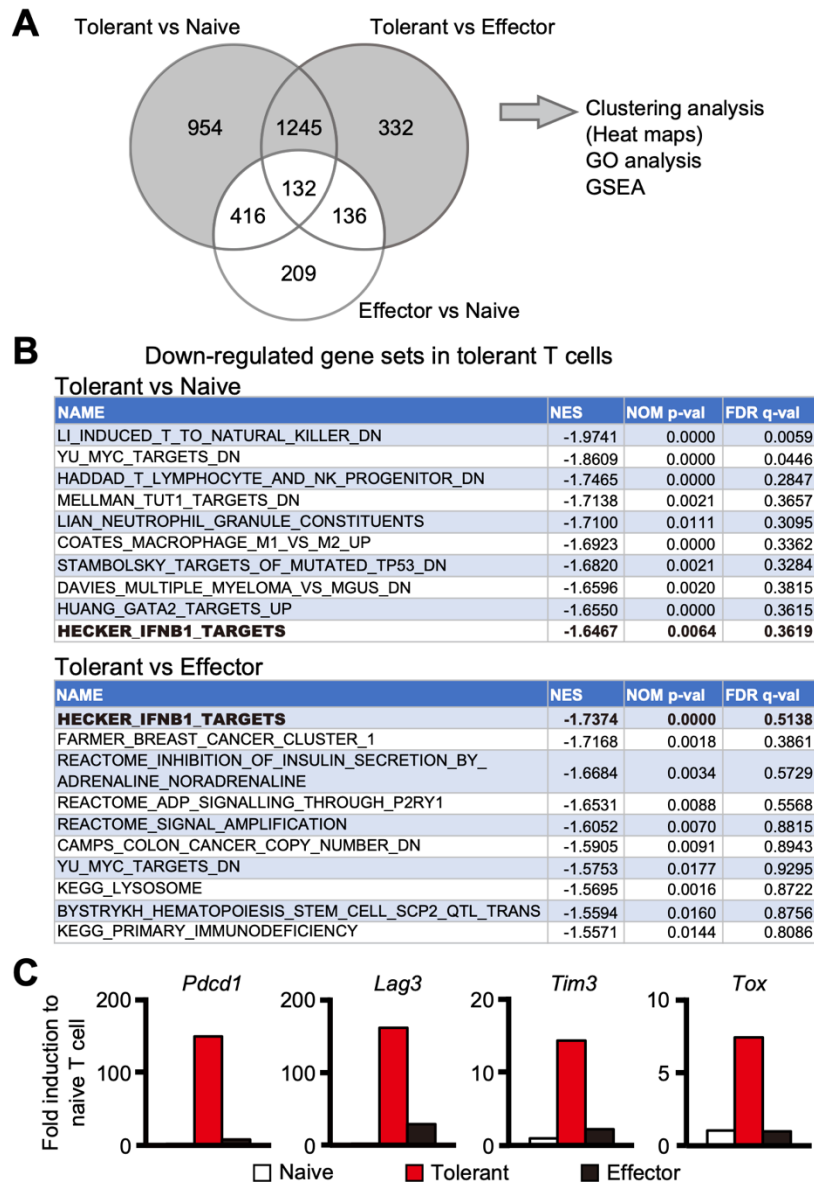

**Supplemental Figure. 2 Supplemental data of microarray analysis.** (A) Venn diagram represented the number of up- and down-regulated genes among naive, tolerant, and effector CPR93-specific CD8<sup>+</sup> T cells. The genes in the gray area were uniquely up- and down-regulated in tolerant T cells and used for clustering, GO, and GSE analysis. (B) List of the top 10 enriched gene sets of down-regulated genes in tolerant COR93-specific CD8<sup>+</sup> cells compared with naive and effector T cells, identified by GSEA (Molecular Signatures Database v6.2; C2 curated gene set). (C) The different mRNA expression levels of checkpoint molecules among naive, tolerant, and effector T cells.

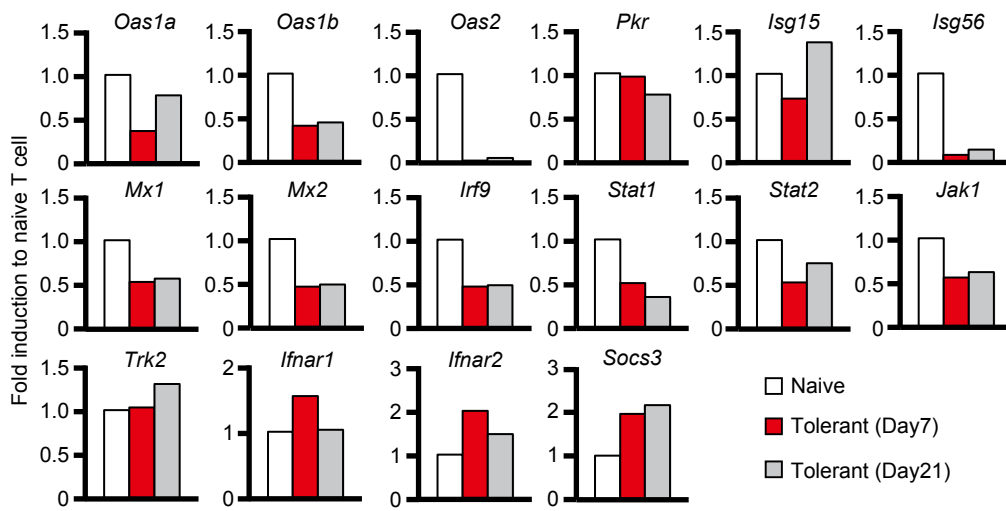

**Supplemental Figure. 3 Expression of IFN-I signaling-related genes remains suppressed in tolerant T cells for a long period.** The expression levels of IFN-I related genes were examined by microarray analysis in naive COR93-specific CD8<sup>+</sup> T cells as well as tolerant T cells on days 7 and 21 after transfer.

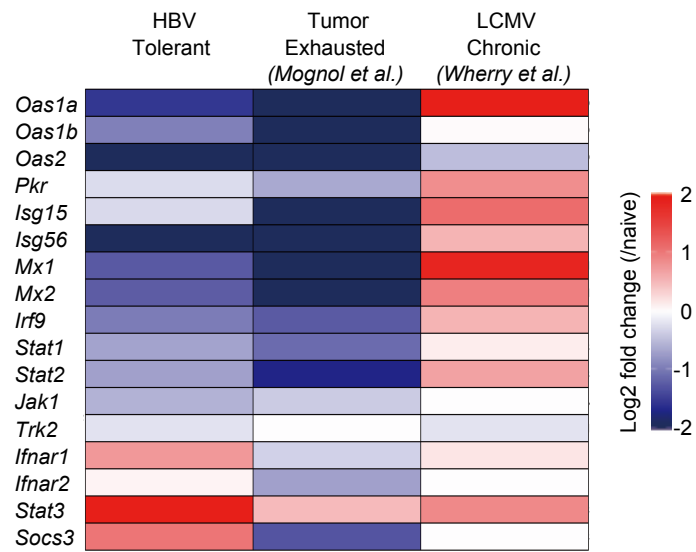

**Supplemental Figure. 4 Comparison of IFN-I related genes with previous studies.** Heat maps of IFN-I related genes were compared between the current study (HBV) and previous studies (OVA tumor; Mognol et al., 2017 and LCMV; Wherry et al., 2007).
